# Supplementary material for: Ethnic inequalities in limiting health and self-reported health in later life revisited
Source: PubMed Central journal article supplement — J Epidemiol Community Health. 2016 Jan 19;70(7):653–62. doi: 10.1136/jech-2015-206074 (PMC4941192; doi:10.1136/jech-2015-206074), 2016-01-19
Supplement: jech-2015-206074-s1.pdf [file jech-2015-206074-s1.pdf]

Supplementary Table 6

**Table 6 Prevalence Ratios of persons aged 60 years and over reporting that health limits typical activities by age, sex and ethnicity compared to White British**

|              | Irish | Other White | Mixed | Indian | Pakistani | Bangladeshi | Other Asian | Caribbean | African | Any other ethnic group |
|--------------|-------|-------------|-------|--------|-----------|-------------|-------------|-----------|---------|------------------------|
| <b>Men</b>   |       |             |       |        |           |             |             |           |         |                        |
| 60-74        | 1.26  | 1.00        | 1.46  | 1.51   | 2.07      | 2.03        | 0.97        | 1.12      | 1.56    | 1.20                   |
| 75 and over  | 1.02  | 1.38        | 0.99  | 1.54   | 1.83      | 1.58        | 0           | 1.37      | 1.58    | 1.44                   |
| All aged 60+ | 1.18  | 1.06        | 1.29  | 1.47   | 1.95      | 1.87        | 0.75        | 1.29      | 1.44    | 1.21                   |
| <b>Women</b> |       |             |       |        |           |             |             |           |         |                        |
| 60-74        | 1.03  | 1.16        | 1.51  | 1.98   | 2.59      | 2.12        | 1.10        | 1.90      | 1.98    | 1.68                   |
| 75 and over  | 1.35  | 0.97        | 1.24  | 1.51   | 1.41      | 1.62        | 1.08        | 1.15      | 0.97    | 1.15                   |
| All aged 60+ | 1.11  | 1.07        | 1.45  | 1.67   | 2.06      | 1.71        | 0.96        | 1.56      | 1.55    | 1.42                   |
| <b>All</b>   |       |             |       |        |           |             |             |           |         |                        |
| 60-74        | 1.14  | 1.11        | 1.49  | 1.72   | 2.29      | 2.06        | 1.03        | 1.57      | 1.78    | 1.44                   |
| 75 and over  | 1.15  | 1.10        | 1.14  | 1.46   | 1.59      | 1.44        | 0.70        | 1.23      | 1.23    | 1.26                   |
| All aged 60+ | 1.14  | 1.08        | 1.39  | 1.54   | 1.96      | 1.76        | 0.85        | 1.43      | 1.49    | 1.32                   |
