# Supplementary material for: Ethnic inequalities in limiting health and self-reported health in later life revisited
Source: PubMed Central journal article supplement — J Epidemiol Community Health. 2016 Jan 19;70(7):653–62. doi: 10.1136/jech-2015-206074 (PMC4941192; doi:10.1136/jech-2015-206074), 2016-01-19
Supplement: jech-2015-206074-s2.pdf [file jech-2015-206074-s2.pdf]

Supplementary Table 7

**Table 7 Prevalence Ratios of persons aged 60 years and over reporting ‘poor’ health by age, sex and ethnicity compared to White British**

|              | Irish | Other White | Mixed | Indian | Pakistani | Bangladeshi | Other Asian | Caribbean | African | Any other ethnic group |
|--------------|-------|-------------|-------|--------|-----------|-------------|-------------|-----------|---------|------------------------|
| <b>Men</b>   |       |             |       |        |           |             |             |           |         |                        |
| 60-74        | 1.55  | 1.28        | 1.60  | 0.69   | 3.41      | 1.85        | 1.07        | 0.35      | 1.60    | 1.63                   |
| 75 and over  | 1.05  | 1.30        | 1.30  | 1.92   | 3.25      | 2.60        | 0           | 2.17      | 3.90    | 1.77                   |
| All aged 60+ | 1.38  | 1.26        | 1.51  | 1.00   | 3.33      | 2.14        | 0.91        | 1.11      | 1.91    | 1.62                   |
| <b>Women</b> |       |             |       |        |           |             |             |           |         |                        |
| 60-74        | 1.39  | 1.09        | 1.02  | 1.81   | 3.77      | 2.54        | 1.38        | 1.71      | 1.90    | 2.71                   |
| 75 and over  | 1.82  | 1.50        | 1.44  | 2.08   | 3.90      | 6.24        | 2.08        | 2.01      | 2.50    | 2.23                   |
| All aged 60+ | 1.50  | 1.23        | 1.29  | 1.73   | 3.58      | 2.44        | 1.37        | 1.78      | 1.85    | 2.46                   |
| <b>All</b>   |       |             |       |        |           |             |             |           |         |                        |
| 60-74        | 1.55  | 1.28        | 1.60  | 0.69   | 3.41      | 1.85        | 1.07        | 0.35      | 1.60    | 1.63                   |
| 75 and over  | 1.05  | 1.30        | 1.30  | 1.92   | 3.25      | 2.60        | 0           | 2.17      | 3.90    | 1.77                   |
| All aged 60+ | 1.38  | 1.26        | 1.51  | 1.00   | 3.33      | 2.14        | 0.91        | 1.11      | 1.91    | 1.62                   |
